# Supplementary material
Source: HighWire-hosted journal article supplement (https://jnm.snmjournals.org/highwire/filestream/94907/field_highwire_adjunct_files/0/163121_Supplemental_Data.pdf)
Supplement: 163121_Supplemental_Data.pdf [file 163121_Supplemental_Data.pdf]

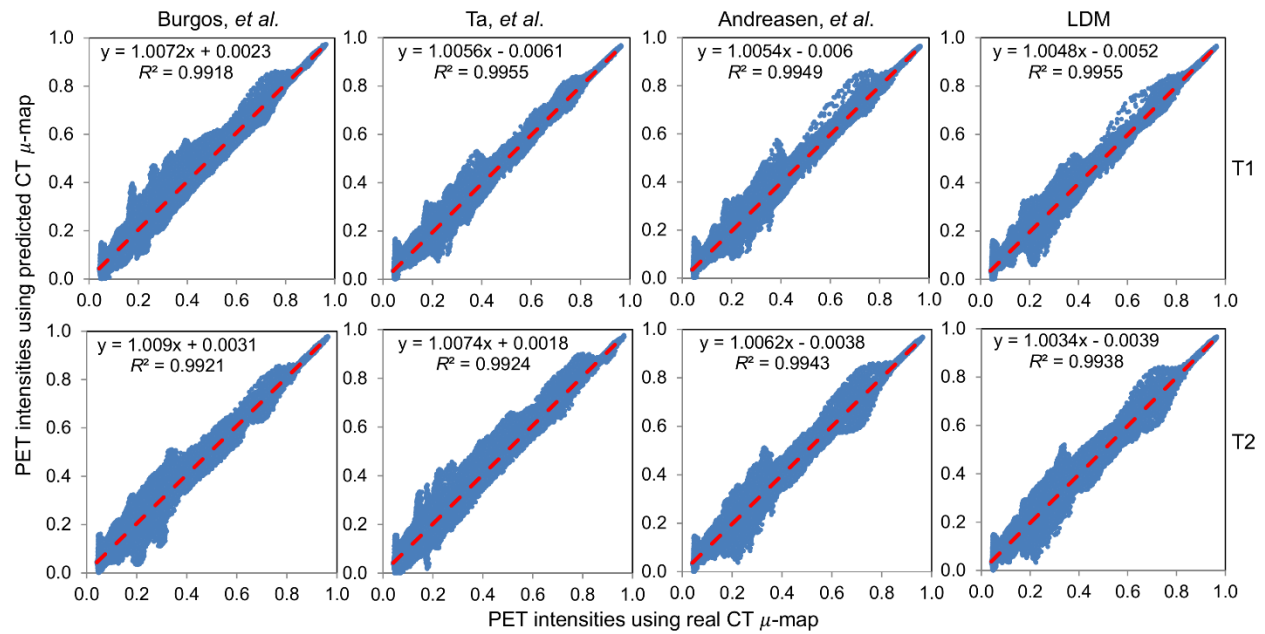

Supplemental Figure 1. Scatter plots of predicted CT based PET intensities versus real CT based PET intensities of the slice in Figure 5 by four methods using T1 (row 1) or T2 (row 2). Dashed red lines indicate a linear fit for the points.
